# Supplementary material for: Long-term outcome in young women with breast cancer: a population-based study
Source: Springer Nature journal article supplement (doi:10.1007/s10549-016-3983-9), 2016-09-13
Supplement: MOESM2 [file 10696332]

**Supplementary Figure S2.** Time trends of systemic treatment in 1120 women with stage I-III breast cancer by tumor size, lymph node status, grade and subtype according to age (<40, n=635, ≥40, n=485)

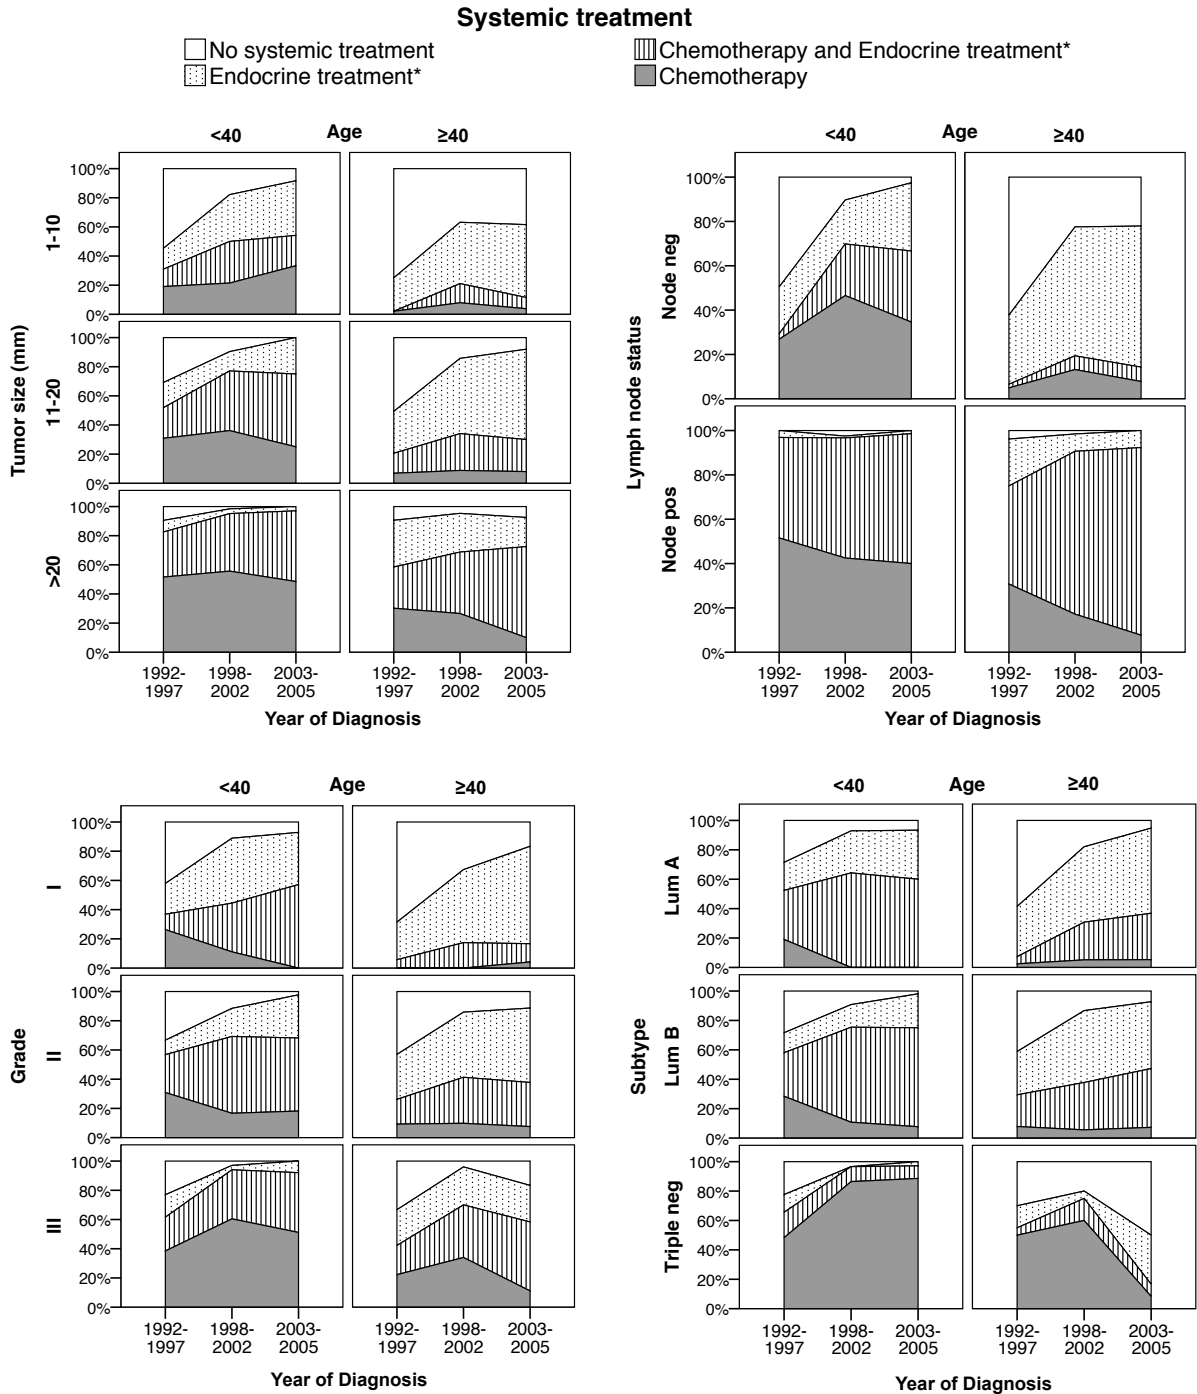

Un-informative cases are excluded from the analysis (systemic treatment; n=2, tumor size; n=3, grade; n=79). Only cases classified as subtype Luminal A, Luminal B and Triple-negative are included in the subtype panel (n=747). \*Endocrine treatment including ovarian suppression.
